# Supplementary material
Source: PubMed Central journal article supplement (PMC2568080)
Supplement: NIHMS68354-supplement-1.pdf [file NIHMS68354-supplement-1.pdf]

## Supporting Information

### Efficient Solid-Phase Synthesis of 2-Substituted-3-Hydroxy-4(1H)-Quinolinone-7-Carboxamides with Two Diversity Positions

Miroslav Soural\* and Viktor Krchňák\*

*Department of Chemistry and Biochemistry, 251 Nieuwland Science Center, University of Notre Dame, Notre Dame, Indiana 46556, USA*

#### Material and Methods

Solvents were purchased from Fisher (Pittsburgh, PA, [www.fishersci.com](http://www.fishersci.com)) and used without further purification. Chemicals were obtained from Aldrich (Milwaukee, IL, [www.sigmaaldrich.com](http://www.sigmaaldrich.com)) and Alfa Aesar (Ward Hill, MA, [www.alfa.com](http://www.alfa.com)), the Rink resin (100-200 mesh, 1% DVB, 0.75 mmol/g), and the aminomethylmethyl resin (100-200 mesh, 1% DVB, 0.88 mmol/g) from NovaBiochem (EMD Chemicals, San Diego, CA, [www.emdbiosciences.com](http://www.emdbiosciences.com)). Synthesis was carried out on Domino Blocks in disposable polypropylene reaction vessels (Torviq, Niles, MI, [www.torviq.com](http://www.torviq.com)). Labquake Tube Rotator (Thermolyne, Dubuque, IA, [www.barnsteadthermolyne.com](http://www.barnsteadthermolyne.com)) was used for gentle but efficient tumbling of resin slurry.

All reactions were carried out at ambient temperature (21 °C) unless stated otherwise. The volume of wash solvent was 10 mL per 1 g of resin. For washing, resin slurry was shaken with the fresh solvent for at least 1 min before changing the solvent. After adding a reagent solution, the resin slurry was manually vigorously shaken to break any potential resin clumps. Resin-bound intermediates were dried by a stream of nitrogen for prolonged storage and/or quantitative analysis.

For the LC/MS analysis a sample of resin (~5 mg) was treated by TFA in DCM, the cleavage cocktail was evaporated by a stream of nitrogen, and cleaved compounds extracted into 1 mL of MeOH.

The LC/MS analyses were carried out on Waters ZQ instrument consisting of chromatography module Alliance HT, photodiode array detector 2996, and mass spectrometer Micromass ZQ, using a 3 x 50 mm Pro C18 YMC reverse phase column (Waters, Milford, MA, [www.waters.com](http://www.waters.com)). Mobile phases: 10 mM ammonium acetate in HPLC grade water (A) and HPLC grade acetonitrile (B). A gradient was formed from 5% to 80% of B in 10 min at 0.7 mL/min. Target compounds were analyzed using 0.1% aqueous TFA (A) in a gradient from 5% to 90% of B in 6 min at 0.7 mL/min. The MS electrospray source operated at capillary voltage 3.5 kV and a desolvation temperature 300 °C.

Purification was carried out on SunFire Prep C18 OBD column 19 x 100 mm, 5 um particles (Waters, Milford, MA, [www.waters.com](http://www.waters.com)), gradient was formed from 0.1% aqueous TFA and acetonitrile, flow rate 15 mL/min.

NMR <sup>1</sup>H/<sup>13</sup>C spectra were obtained on a Varian UnityPlus (299.89 MHz, <sup>1</sup>H) instrument. NMR spectra were recorded at ambient temperature (21 °C) in DMSO-*d*<sub>6</sub> solutions and referenced to the resonance signal of DMSO at δ=2.50 ppm (<sup>1</sup>H spectra) and δ=39.51 ppm (<sup>13</sup>C spectra). Chemical shifts δ are reported in ppm and coupling constants *J* in Hz.

#### Reductive Alkylation (resins 6)

Polymer-supported secondary amines **6** were prepared according to the published procedure.<sup>1</sup>

---

\* Current address: Department of Organic Chemistry, Faculty of Science, University of Palacký, 771 46 Olomouc, Czech Republic

### **Acylation with 1-methyl-2-aminoterephthalate (resins 1, 7)**

A polypropylene 10-ml fritted syringe was charged with 500 mg of resin **6** (or Rink amide resin in the case of resin **1**), and the resin was swollen in 5 ml of DCM. Accordingly to the loading of the starting resin, the solution of 2 equivalents of 1-methyl-2-aminoterephthalate, 1-hydroxybenzotriazole and 1,3-diisopropylcarbodiimide in 5 ml DMF was added. Resin was kept on a tumbler overnight, then washed 3 three times with DMF, three times with DCM, three times with MeOH and dried.

### **Saponification of methylesters (resins 2, 8)**

A polypropylene 10-ml fritted syringe was charged with 500 mg of resin **1** (or **7**) and solution of 150 mg TMSOK in 5 ml THF was added. The resin was shaken at room temperature for 5 h, acidified with 20% HAc/DMF, washed 3 three times with DMF, three times with DCM, three times with MeOH and dried.

### **Preparation of anthranilates (resins 3, 9)**

A polypropylene 10-ml fritted syringe was charged with 200 mg of resin **2** (or **8**) and the resin was shaken with 5% TEA/DMF (2 ml) for 5 min. Then a solution of 50 mg phenacylbromide in 1 ml DMF was added, the resin was kept on a tumbler for 2 h, washed 3 three times with DMF, three times with DCM, three times with MeOH and dried.

### **Cleavage and cyclization to hydroxyquinolinones (5, 11, 12)**

A polypropylene 5-ml fritted syringe was charged with 200 mg of resin **3** (or **9**) and 50% TFA in DCM was added (3 ml). The resin was shaken for 30 min, the cleavage cocktail was collected and the content of the syringe was washed 2 times with fresh 50% TFA in DCM. Combined washes were evaporated by a stream of nitrogen, the residual material was dissolved in a neat TFA and heated at 80 °C for 2 h. TFA was evaporated in a stream of nitrogen and residual oil was sonified in diethylether for 5 min. Precipitated solid was collected by suction, washed with fresh diethylether and dried.

### **2-(4-methyl-phenyl)-3-hydroxy-4(1H)-quinolinone-7-carboxamide (5)**

Yield of the crude product 90 %, yield of the purified product 84%, purity of the purified product 98%. ESI-MS  $m/z$  = 295,  $[M+H]^+$ .  $^1H$  NMR (300 MHz, DMSO- $d_6$ )  $\delta$  ppm 2.40 (s, 3 H) 7.38 (d,  $J=8.01$  Hz, 2 H) 7.55 (br. s., 1 H) 7.64 - 7.79 (m, 3 H) 8.09 - 8.21 (m, 2 H) 8.24 (s, 1 H) 11.70 (br. s., 1 H);  $^{13}C$  NMR (300 MHz, DMSO- $d_6$ )  $\delta$  ppm 21.0, 118.9, 120.1, 123.0, 124.6, 128.9, 129.1, 129.2, 132.4, 136.2, 137.4, 138.5, 139.0, 167.6, 169.5.

### **2-(4-methyl-phenyl)-3-hydroxy-4(1H)-quinolinone-7-carboxylic acid N-propylamide (11a)**

Yield of the crude product 98 %, yield of the purified product 90%, purity of the purified product 99%. ESI-MS  $m/z$  = 337,  $[M+H]^+$ .  $^1H$  NMR (300 MHz, DMSO- $d_6$ )  $\delta$  ppm 0.91 (t,  $J=7.46$  Hz, 3 H) 1.45 - 1.65 (m, 2 H) 2.40 (s, 3 H) 3.25 (q,  $J=6.63$  Hz, 2 H) 7.38 (d,  $J=8.01$  Hz, 2 H) 7.66 (d,  $J=8.29$  Hz, 1 H) 7.73 (d,  $J=8.01$  Hz, 2 H) 8.13 - 8.27 (m, 2 H) 8.64 (t,  $J=5.52$  Hz, 1 H) 11.69 (s, 1 H);  $^{13}C$  NMR (300 MHz, DMSO- $d_6$ )  $\delta$  ppm 12.2, 21.7, 23.07, 41.9, 119.3, 120.4, 123.5, 125.3, 129.6, 129.8, 129.9, 133.1, 137.3, 138.1, 139.2, 139.8, 166.5, 170.2.

### **2-(4-methyl-phenyl)-3-hydroxy-4(1H)-quinolinone-7-carboxylic acid N-(2-hydroxyethyl)-amide (11b)**

Yield of the crude product 85 %, yield of the purified product 76%, purity of the purified product 99%. ESI-MS  $m/z$  = 339,  $[M+H]^+$ .  $^1H$  NMR (300 MHz, DMSO- $d_6$ )  $\delta$  ppm 2.40 (s, 3 H) 3.67 (q,  $J=5.43$  Hz, 2 H) 4.55 (t,  $J=5.25$  Hz, 2 H) 7.38 (d,  $J=8.01$  Hz, 2 H) 7.64 (d,  $J=7.73$  Hz, 1 H) 7.73 (d,  $J=8.01$  Hz, 2 H) 8.16 - 8.27 (m, 2 H) 8.89 (t,  $J=5.11$  Hz, 1 H) 11.74 (br. s., 1 H);  $^{13}C$  NMR

(300 MHz, DMSO-*d*<sub>6</sub>)  $\delta$  ppm 21.0, 38.0, 59.7, 67.0, 118.8, 119.6, 123.0, 124.8, 128.8, 129.1, 129.2, 135.8, 137.4, 138.5, 139.1, 166.4, 169.4.

**2-(4-methyl-phenyl)-3-hydroxy-4(1*H*)-quinolinone-7-carboxylic acid N-(4-methylbenzyl)-amide (11c)**

Yield of the crude product 93 %, yield of the purified product 85%, purity of the purified product 99%, ESI-MS  $m/z$  = 399,  $[M+H]^+$ . <sup>1</sup>H NMR (300 MHz, DMSO-*d*<sub>6</sub>)  $\delta$  ppm 2.28 (s, 3 H) 2.40 (s, 3 H) 4.46 (d,  $J=6.08$  Hz, 2 H) 7.14 (d,  $J=7.73$  Hz, 2 H) 7.24 (d,  $J=8.01$  Hz, 2 H) 7.38 (d,  $J=8.29$  Hz, 2 H) 7.66 - 7.77 (m, 3 H) 8.20 (d,  $J=8.56$  Hz, 1 H) 8.26 (s, 1 H) 9.19 (t,  $J=5.80$  Hz, 1 H) 11.72 (s, 1 H); <sup>13</sup>C NMR (300 MHz, DMSO-*d*<sub>6</sub>)  $\delta$  ppm 21.4, 21.7, 43.2, 119.5, 120.5, 123.6, 125.4, 128.0, 129.6, 129.8, 129.9, 133.1, 136.6, 137.0, 137.2, 138.2, 139.2, 139.8, 141.5, 166.5, 170.2.

**2-(4-methyl-phenyl)-3-hydroxy-4(1*H*)-quinolinone-7-carboxylic acid N-(1-imidazolylpropyl)-amide (11d)**

Yield of the crude product 96 %, yield of the purified product 88%, purity of the purified product 97%, ESI-MS  $m/z$  = 403,  $[M+H]^+$ . <sup>1</sup>H NMR (300 MHz, DMSO-*d*<sub>6</sub>)  $\delta$  ppm 2.02 - 2.21 (m, 2 H) 2.41 (s, 3 H) 3.32 (q,  $J=6.08$  Hz, 2 H) 4.28 (t,  $J=6.91$  Hz, 2 H) 7.39 (d,  $J=8.01$  Hz, 2 H) 7.62 - 7.77 (m, 3 H) 7.85 (s, 1 H) 8.21 (d,  $J=8.56$  Hz, 2 H) 8.26 (s, 1 H) 8.78 (t,  $J=5.52$  Hz, 1 H) 9.16 (s, 1 H) 11.73 (br. s., 1 H); <sup>13</sup>C NMR (300 MHz, DMSO-*d*<sub>6</sub>)  $\delta$  ppm 21.7, 30.3, 36.9, 47.3, 119.5, 120.4, 120.7, 122.8, 123.7, 125.4, 129.6, 129.8, 129.9, 136.2, 136.7, 138.2, 139.2, 139.8, 166.7.

**2-(4-methyl-phenyl)-3-hydroxy-4(1*H*)-quinolinone-7-carboxylic acid N-(2-thienylmethyl)-amide (11e)**

Yield of the crude product 60 %, yield of the purified product 52%, purity of the purified product 98%, ESI-MS  $m/z$  = 391,  $[M+H]^+$ . <sup>1</sup>H NMR (300 MHz, DMSO-*d*<sub>6</sub>)  $\delta$  ppm 2.40 (s, 3 H) 4.66 (d,  $J=5.52$  Hz, 2 H) 6.94 - 7.00 (m, 1 H) 7.05 (d,  $J=3.59$  Hz, 1 H) 7.34 - 7.43 (m, 3 H) 7.67 (d,  $J=8.84$  Hz, 1 H) 7.73 (d,  $J=8.29$  Hz, 2 H) 8.19 (d,  $J=7.46$  Hz, 1 H) 8.25 (s, 1 H) 9.32 (t,  $J=5.94$  Hz, 1 H) 11.70 (s, 1 H); <sup>13</sup>C NMR (300 MHz, DMSO-*d*<sub>6</sub>)  $\delta$  ppm 21.0, 37.9, 118.8, 119.6, 123.0, 124.8, 125.1, 125.5, 126.7, 128.9, 129.1, 129.2, 132.4, 138.5, 139.1, 142.4, 165.7, 169.5.

**2-(4-methyl-phenyl)-3-hydroxy-4(1*H*)-quinolinone-7-carboxylic acid N-(1-piperidinylethyl)-amide (11f)**

Yield of the crude product 90 %, yield of the purified product 83%, purity of the purified product 95%, ESI-MS  $m/z$  = 406,  $[M+H]^+$ . <sup>1</sup>H NMR (300 MHz, DMSO-*d*<sub>6</sub>)  $\delta$  ppm 1.57 - 1.75 (m, 4 H) 1.76 - 1.90 (m, 2 H) 2.40 (s, 3 H) 2.89 - 3.04 (m, 2 H) 3.28 (q,  $J=5.74$  Hz, 2 H) 3.50 - 3.62 (m, 2 H) 3.67 (q,  $J=5.74$  Hz, 2 H) 7.38 (d,  $J=8.13$  Hz, 2 H) 7.65 - 7.77 (m, 3 H) 8.24 (d,  $J=8.61$  Hz, 1 H) 8.31 (s, 1 H) 8.95 (t,  $J=5.74$  Hz, 1 H) 11.72 (br. s., 1 H); <sup>13</sup>C NMR (300 MHz, DMSO-*d*<sub>6</sub>)  $\delta$  ppm 21.0, 21.2, 22.3, 34.4, 52.3, 55.1, 113.8, 117.6, 119.1, 119.9, 123.1, 124.7, 128.9, 129.1, 129.2, 133.2, 135.6, 137.4, 138.6, 139.3, 166.4.

**2-(4-methoxy-phenyl)-3-hydroxy-4(1*H*)-quinolinone-7-carboxylic acid N-propylamide (12B)**

Yield of the crude product 92 %, yield of the purified product 85%, purity of the purified product 99%, ESI-MS  $m/z$  = 353,  $[M+H]^+$ . <sup>1</sup>H NMR (300 MHz, DMSO-*d*<sub>6</sub>)  $\delta$  ppm 0.91 (t,  $J=7.32$  Hz, 3 H) 1.46 - 1.66 (m, 2 H) 3.25 (q,  $J=6.17$  Hz, 2 H) 3.85 (s, 3 H) 7.13 (d,  $J=8.56$  Hz, 2 H) 7.65 (d,  $J=8.56$  Hz, 1 H) 7.80 (d,  $J=8.56$  Hz, 2 H) 8.18 (d,  $J=8.56$  Hz, 1 H) 8.22 (s, 1 H) 8.64 (t,  $J=5.39$  Hz, 1 H) 11.67 (s, 1 H); <sup>13</sup>C NMR (300 MHz, DMSO-*d*<sub>6</sub>)  $\delta$  ppm 11.5, 22.4, 41.1, 55.4, 113.8, 118.6, 118.7, 122.8, 124.2, 124.6, 130.7, 132.3, 136.5, 137.4, 138.3, 160.0, 165.8, 169.4.

**2-(3-bromo-phenyl)-3-hydroxy-4(1*H*)-quinolinone-7-carboxylic acid N-propylamide (12C)**

Yield of the crude product 90 %, yield of the purified product 82%, purity of the purified product 98%, ESI-MS  $m/z = 401$ ,  $[M+H]^+$ .  $^1H$  NMR (300 MHz, DMSO- $d_6$ )  $\delta$  ppm 0.41 (t,  $J=7.32$  Hz, 3 H) 0.95 - 1.17 (m, 2 H) 2.75 (q,  $J=6.54$  Hz, 2 H) 7.04 (t,  $J=7.87$  Hz, 1 H) 7.17 (d,  $J=8.56$  Hz, 1 H) 7.23 (d,  $J=8.56$  Hz, 1 H) 7.34 (d,  $J=7.73$  Hz, 1 H) 7.51 (s, 1 H) 7.63 - 7.76 (m, 2 H) 8.16 (t,  $J=5.11$  Hz, 1 H) 11.29 (br. s., 1 H);  $^{13}C$  NMR (300 MHz, DMSO- $d_6$ )  $\delta$  ppm 12.2, 23.1, 41.9, 119.3, 120.6, 122.2, 123.7, 125.4, 129.2, 131.2, 132.4, 132.8, 135.0, 137.5, 138.28., 139.4, 166.4, 170.0.

### **2-(3,5-dichloro-4-amino-phenyl)-3-hydroxy-4(1H)-quinolinone-7-carboxylic acid N-propylamide (12D)**

Yield of the crude product 89 %, yield of the purified product 81%, purity of the purified product 98%, ESI-MS  $m/z = 406$ ,  $[M+H]^+$ .  $^1H$  NMR (300 MHz, DMSO- $d_6$ )  $\delta$  ppm 0.91 (t,  $J=7.32$  Hz, 3 H) 1.46 - 1.66 (m, 2 H) 3.19 - 3.32 (q,  $J=6.08$  Hz, 2 H) 6.04 (br. s., 2 H) 7.65 (d,  $J=8.56$  Hz, 1 H) 7.81 (s, 2 H) 8.15 (d,  $J=8.56$  Hz, 1 H) 8.21 (s, 1 H) 8.64 (t,  $J=5.66$  Hz, 1 H) 11.55 (s, 1 H);  $^{13}C$  NMR (300 MHz, DMSO- $d_6$ )  $\delta$  ppm 11.5, 22.4, 41.3, 117.4, 118.5, 119.7, 119.9, 122.7, 124.5, 128.7, 130.1, 136.5, 137.4, 138.3, 142.1, 165.7, 169.4.

### **2-(3-nitro-4-chloro-phenyl)-3-hydroxy-4(1H)-quinolinone-7-carboxylic acid N-propylamide (12E)**

Yield of the crude product 85 %, yield of the purified product 78%, purity of the purified product 97 %, ESI-MS  $m/z = 402$ ,  $[M+H]^+$ .  $^1H$  NMR (300 MHz, DMSO- $d_6$ )  $\delta$  ppm 0.91 (t,  $J=7.32$  Hz, 3 H) 1.47 - 1.67 (m, 2 H) 3.26 (q,  $J=6.08$  Hz, 2 H) 7.69 (d,  $J=8.56$  Hz, 1 H) 8.00 (d,  $J=8.01$  Hz, 1 H) 8.12 - 8.25 (m, 3 H) 8.53 (s, 1 H) 8.69 (t,  $J=5.25$  Hz, 1 H) 11.87 (br. s., 1 H);  $^{13}C$  NMR (300 MHz, DMSO- $d_6$ )  $\delta$  ppm 12.2, 23.1, 41.9, 119.3, 120.7, 123.8, 125.5, 126.3, 126.9, 129.4, 132.3, 133.0, 135.2, 137.6, 138.4, 139.8, 140.1, 166.3.

### **2-(4-fluoro-phenyl)-3-hydroxy-4(1H)-quinolinone-7-carboxylic acid N-propylamide (12F)**

Yield of the crude product 95 %, yield of the purified product 85%,purity of the purified product 98 %, ESI-MS  $m/z = 341$ ,  $[M+H]^+$ .  $^1H$  NMR (300 MHz, DMSO- $d_6$ )  $\delta$  ppm 0.91 (t,  $J=7.32$  Hz, 3 H) 1.47 - 1.66 (m, 2 H) 3.25 (q,  $J=6.63$  Hz, 2 H) 7.42 (t,  $J=8.84$  Hz, 2 H) 7.67 (d,  $J=8.56$  Hz, 1 H) 7.88 (dd,  $J=8.29, 5.52$  Hz, 2 H) 8.14 - 8.25 (m, 2 H) 8.65 (t,  $J=4.70$  Hz, 1 H) 11.76 (br. s., 1 H);  $^{13}C$  NMR (300 MHz, DMSO- $d_6$ )  $\delta$  ppm 11.5, 22.4, 41.1, 115.2, 115.4, 118.6, 119.8, 123.0., 124.6, 131.4, 131.6, 131.7, 136.6, 137.5, 158.5, 165.7, 169.7.

### **2-(3-thienyl)-3-hydroxy-4(1H)-quinolinone-7-carboxylic acid N-propylamide (12G)**

Yield of the crude product 95 %, yield of the purified product 87%, purity of the purified product 99 %, ESI-MS  $m/z = 329$ ,  $[M+H]^+$ .  $^1H$  NMR (300 MHz, DMSO- $d_6$ )  $\delta$  ppm 0.92 (t,  $J=7.32$  Hz, 3 H) 1.41 - 1.70 (m, 2 H) 3.26 (q,  $J=6.26$  Hz, 2 H) 7.66 (d,  $J=8.01$  Hz, 1 H) 7.72 - 7.81 (m, 1 H) 7.86 (d,  $J=4.42$  Hz, 1 H) 8.17 (d,  $J=8.56$  Hz, 1 H) 8.23 - 8.38 (m, 2 H) 8.66 (t,  $J=5.52$  Hz, 1 H) 11.49 (br. s., 1 H);  $^{13}C$  NMR (300 MHz, DMSO- $d_6$ )  $\delta$  ppm 11.5, 22.4, 41.2, 118.6, 119.7, 122.6, 124.6, 126.4, 127.6, 127.7, 132.5, 136.7, 137.4, 138.5, 165.8, 169.7.

### **2-methyl-3-hydroxy-4(1H)-quinolinone-7-carboxylic acid N-propylamide (12H)**

Yield of the crude product 92 %, yield of the purified product 83%, purity of the purified product 98 %, ESI-MS  $m/z = 261$ ,  $[M+H]^+$ .  $^1H$  NMR (300 MHz, DMSO- $d_6$ )  $\delta$  ppm 0.91 (t,  $J=7.32$  Hz, 3 H) 1.45 - 1.65 (m, 2 H) 2.45 (s, 3 H) 3.25 (q,  $J=6.63$  Hz, 2 H) 7.70 (d,  $J=8.56$  Hz, 1 H) 8.05 (s, 1 H) 8.17 (d,  $J=8.56$  Hz, 1 H) 8.68 (t,  $J=5.25$  Hz, 1 H) 12.28 (br. s., 1 H);  $^{13}C$  NMR (300 MHz, DMSO- $d_6$ )  $\delta$  ppm 11.5, 14.6, 22.4, 41.1, 117.9, 120.3, 123.0, 124.4, 135.7, 136.2, 136.3, 138.5, 165.5, 166.1.

### **Alkylation of resin 7a with ethyl-bromoacetate**

To 50 mg of resin **7a** in 1 ml of dry NMP 28  $\mu$ l of ethyl-bromoacetate and 44  $\mu$ l of 2-tert-butylimino-2-diethylamino-1,3-dimethyl-perhydro-1,3,2-diazaphosphorine was added. The resin was heated at 50 °C for 48 h, washed 3 three times with DMF, three times with DCM, three times with MeOH and dried.

#### **Alkylation of resin 7a with benzylbromide**

To 50 mg of resin **7a** in 1 ml of dry NMP 40  $\mu$ l of benzylbromide and 44  $\mu$ l of 2-tert-butylimino-2-diethylamino-1,3-dimethyl-perhydro-1,3,2-diazaphosphorine was added. The resin was heated at 50 °C for 12 h, washed 3 three times with DMF, three times with DCM, three times with MeOH and dried.

#### **Benzoylation of resin 7a**

To 50 mg of resin **7a** was added 1 ml of pyridine and 50  $\mu$ l of benzoylchloride. The resin was shaken at room temperature for 5 h, washed 3 three times with DMF, three times with DCM, three times with MeOH and dried.

#### **References**

1. Krchnak, V.; Smith, J.; Vagner, J. *Collect. Czech. Chem. Commun.* **2001**, *66*, 1078-1106.
